# Supplementary material for: Distinct Dose-Dependent Association of Free Fatty Acids with Diabetes Development in Nonalcoholic Fatty Liver Disease Patients
Source: PubMed Central journal article supplement — Diabetes Metab J. 2021 Mar 15;45(3):417–29. doi: 10.4093/dmj.2020.0039 (PMC8164943; doi:10.4093/dmj.2020.0039), 2021-03-15
Supplement: dmj-2020-0039-suppl1.pdf [file dmj-2020-0039-suppl1.pdf]

**Supplementary Table 1.** Characteristic comparison among free fatty acid levels quartiles

| Characteristic         | Quartile 1<br>(n=950) | Quartile 2<br>(n=953) | Quartile 3<br>(n=950) | Quartile 4<br>(n=1,157) | P value | Post hoc comparison |           |           |           |           |           |
|------------------------|-----------------------|-----------------------|-----------------------|-------------------------|---------|---------------------|-----------|-----------|-----------|-----------|-----------|
|                        |                       |                       |                       |                         |         | Q1 vs. Q2           | Q1 vs. Q3 | Q1 vs. Q4 | Q2 vs. Q3 | Q2 vs. Q4 | Q3 vs. Q4 |
| Age, yr                | 46.6±28.0             | 44.7±14.4             | 45.0±14.7             | 47.1±14.6               | 0.02    | 0.04                | 0.09      | 0.59      | 0.77      | <0.01     | 0.02      |
| Male sex, %            | 64.7                  | 64.0                  | 62.9                  | 60.0                    | 0.21    | -                   | -         | -         | -         | -         | -         |
| Current smoker, %      | 9.1                   | 9.3                   | 9.7                   | 9.1                     | 0.34    | -                   | -         | -         | -         | -         | -         |
| BMI, kg/m <sup>2</sup> | 24.2 (21.9–26.6)      | 24.6 (22.3–27.1)      | 24.5 (22.2–27.3)      | 24.7 (21.6–27.4)        | 0.26    | -                   | -         | -         | -         | -         | -         |
| WC, cm                 | 85 (77–91)            | 87 (80–93)            | 85 (78–93)            | 86 (78–93)              | 0.12    | -                   | -         | -         | -         | -         | -         |
| SBP, mm Hg             | 125 (117–139)         | 126 (118–137)         | 128 (120–140)         | 130 (120–143)           | <0.01   | 1.00                | 0.16      | <0.01     | 1.00      | 0.03      | 1.00      |
| DBP, mm Hg             | 82 (73–89)            | 83 (75–90)            | 85 (77–93)            | 85 (77–94)              | <0.01   | 0.35                | <0.01     | <0.01     | 0.08      | 0.02      | 1.00      |
| ALT, U/L               | 28 (18–44)            | 31 (20–50)            | 32 (22–54)            | 34 (21–58)              | <0.01   | <0.01               | <0.01     | <0.01     | 0.85      | <0.01     | 0.31      |
| AST, U/L               | 26 (20–32)            | 27 (22–36)            | 29 (22–41)            | 31 (24–47)              | <0.01   | <0.01               | <0.01     | <0.01     | 1.00      | <0.01     | <0.01     |
| GGT, U/L               | 28 (18–46)            | 29 (19–47)            | 33 (22–56)            | 37 (23–66)              | <0.01   | 1.00                | <0.01     | <0.01     | 0.04      | <0.01     | 0.01      |
| ALP, U/L               | 73 (62–86)            | 73 (64–87)            | 77 (67–90)            | 81 (68–95)              | <0.01   | 1.00                | <0.01     | <0.01     | <0.01     | <0.01     | 0.04      |
| Uric acid, μmol/L      | 361 (297–428)         | 386 (306–452)         | 372 (306–446)         | 380 (316–451)           | <0.01   | <0.01               | 0.41      | <0.01     | 0.35      | 1.00      | 0.21      |
| CHOL, mmol/L           | 4.7 (4.0–5.4)         | 5.0 (4.3–5.7)         | 5.0 (4.2–5.6)         | 5.0 (4.2–5.8)           | <0.01   | <0.01               | <0.01     | <0.01     | 1.00      | 1.00      | 0.87      |
| TG, mmol/L             | 1.3 (0.9–1.8)         | 1.3 (0.9–1.9)         | 1.3 (0.9–2.0)         | 1.2 (0.9–1.8)           | 0.35    | -                   | -         | -         | -         | -         | -         |
| HDL-C, mmol/L          | 1.1 (1.0–1.3)         | 1.2 (1.0–1.4)         | 1.2 (1.0–1.4)         | 1.2 (1.0–1.5)           | <0.01   | 0.85                | 0.09      | <0.01     | 1.00      | 0.01      | 0.22      |
| LDL-C, mmol/L          | 2.9 (2.4–3.4)         | 3.1 (2.6–3.7)         | 3.1 (2.5–3.6)         | 3.1 (2.6–3.7)           | <0.01   | <0.01               | <0.01     | <0.01     | 1.00      | 1.00      | 1.00      |
| FPG, mmol/L            | 4.9 (4.4–5.5)         | 4.8 (4.4–5.4)         | 4.9 (4.5–5.5)         | 5.0 (4.5–5.8)           | <0.01   | 1.00                | 1.00      | <0.01     | 0.44      | <0.01     | 0.02      |
| FINS, μU/mL            | 7.3 (5.1–10.1)        | 7.8 (5.5–11.5)        | 7.8 (5.3–11.4)        | 7.9 (5.1–11.2)          | 0.06    | -                   | -         | -         | -         | -         | -         |
| HOMA-IR                | 1.5 (1.0–2.4)         | 1.7 (1.1–2.5)         | 1.8 (1.1–3.0)         | 2.3 (1.3–4.5)           | <0.01   | 0.58                | <0.01     | <0.01     | 0.05      | <0.01     | <0.01     |
| Adipo-IR               | 16.1 (10.8–22.6)      | 25.6 (17.7–37.1)      | 31.4 (21.9–48.2)      | 46.2 (29.6–67.4)        | <0.01   | <0.01               | <0.01     | <0.01     | <0.01     | <0.01     | <0.01     |
| HbA1c, %               | 6.1 (5.5–7.7)         | 6.1 (5.5–7.6)         | 5.9 (5.4–7.8)         | 6.7 (6.0–10.0)          | <0.01   | 1.00                | 1.00      | <0.01     | 1.00      | 0.02      | <0.01     |
| 2hPG, mmol/L           | 10.0 (6.5–17.4)       | 9.3 (7.6–14.0)        | 9.0 (7.5–11.8)        | 10.1 (6.6–14.4)         | 0.90    | -                   | -         | -         | -         | -         | -         |
| IR, %                  | 17.6                  | 21.4                  | 29.6                  | 43.2                    | <0.01   | 0.06                | 0.02      | 0.02      | <0.01     | <0.01     | <0.01     |
| Prediabetes, %         | 13.2                  | 11.6                  | 13.9                  | 13.6                    | 0.54    | -                   | -         | -         | -         | -         | -         |
| T2DM, %                | 18.5                  | 19.2                  | 22.6                  | 36.7                    | <0.01   | 0.56                | 0.08      | <0.01     | 0.09      | <0.01     | <0.01     |

Values are presented as mean ± standard deviation and median (interquartile range).

BMI, body mass index; WC, waist circumference; SBP, systolic blood pressure; DBP, diastolic blood pressure; ALT, alanine aminotransferase; AST, aspartate aminotransferase; GGT, γ-glutamyl transpeptidase; ALP, alkaline phosphatase; CHOL, cholesterol; TG, triglyceride; HDL-C, high-density lipoprotein cholesterol; LDL-C, low-density lipoprotein cholesterol; FPG, fasting plasma glucose; FINS, fasting insulin; HOMA-IR, homeostasis model assessment of insulin resistance; Adipo-IR, adipose tissue insulin resistance; HbA1c, glycosylated hemoglobin; 2hPG, 2-hour plasma glucose; IR, insulin resistance; T2DM, type 2 diabetes mellitus.
