# Supplementary material for: Distinct Dose-Dependent Association of Free Fatty Acids with Diabetes Development in Nonalcoholic Fatty Liver Disease Patients
Source: PubMed Central journal article supplement — Diabetes Metab J. 2021 Mar 15;45(3):417–29. doi: 10.4093/dmj.2020.0039 (PMC8164943; doi:10.4093/dmj.2020.0039), 2021-03-15
Supplement: dmj-2020-0039-suppl3.pdf [file dmj-2020-0039-suppl3.pdf]

**Supplementary Table 3.** Multivariate logistic regression analysis for factors associated with IR, prediabetes, and T2DM in non-NAFLD and NAFLD groups

| Factor                         | IR                  |         |                     |         | Prediabetes          |         |                     |         | T2DM                 |         |                        |         |
|--------------------------------|---------------------|---------|---------------------|---------|----------------------|---------|---------------------|---------|----------------------|---------|------------------------|---------|
|                                | Non-NAFLD           |         | NAFLD               |         | Non-NAFLD            |         | NAFLD               |         | Non-NAFLD            |         | NAFLD                  |         |
|                                | OR (95% CI)         | P value | OR (95% CI)         | P value | OR (95% CI)          | P value | OR (95% CI)         | P value | OR (95% CI)          | P value | OR (95% CI)            | P value |
| FFA, $\mu\text{mol/L}$         | 1.01<br>(1.01–1.02) | <0.01   | 1.01<br>(1.01–1.02) | <0.01   | 1.01<br>(0.98–1.02)  | 0.07    | 1.01<br>(1.01–1.02) | 0.01    | 1.01<br>(0.96–1.02)  | 0.35    | 1.01<br>(1.01–1.02)    | <0.01   |
| Male sex                       | -                   | -       | -                   | -       | -                    | -       | -                   | -       | -                    | -       | 0.96<br>(0.55–1.68)    | 0.89    |
| Age, yr                        | 1.01<br>(0.99–1.03) | 0.21    | 1.01<br>(0.98–1.02) | 0.2     | 1.09<br>(1.06–1.11)  | <0.01   | 1.03<br>(1.00–1.04) | 0.1     | 1.05<br>(1.03–1.07)  | <0.01   | 1.02<br>(1.00–1.04)    | 0.06    |
| Smoking                        | -                   | -       | -                   | -       | -                    | -       | -                   | -       | -                    | -       | -                      | -       |
| BMI $\geq 25 \text{ kg/m}^2$   | 3.61<br>(2.05–6.32) | <0.01   | 1.24<br>(0.83–1.87) | 0.29    | 0.39<br>(0.15–1.88)  | 0.13    | 0.78<br>(0.52–1.15) | 0.21    | -                    | -       | -                      | -       |
| Abdominal obesity <sup>a</sup> | 2.37<br>(1.29–4.30) | <0.01   | 1.71<br>(1.15–2.55) | <0.01   | 0.62<br>(0.27–1.33)  | 0.23    | 1.3<br>(0.89–1.90)  | 0.17    | -                    | -       | 0.61<br>(0.38–0.96)    | 0.04    |
| TG $> 1.8 \text{ mmol/L}$      | 1.48<br>(0.79–2.70) | 0.21    | 1.07<br>(0.75–1.51) | 0.71    | 3.02<br>(0.97–6.14)  | 0.1     | -                   | -       | -                    | -       | -                      | -       |
| CHOL $> 5.2 \text{ mmol/L}$    | 1.3<br>(0.57–2.77)  | 0.51    | -                   | -       | 0.54<br>(0.19–1.38)  | 0.22    | -                   | -       | -                    | -       | 1.02<br>(0.66–1.58)    | 0.06    |
| HDL-C $< 1.0 \text{ mmol/L}$   | 1.36<br>(0.68–2.63) | 0.37    | 1.65<br>(1.12–2.44) | 0.11    | 0.79<br>(0.33–1.74)  | 0.58    | 1.22<br>(0.85–1.75) | 0.27    | 1.32<br>(0.62–2.63)  | 0.45    | -                      | -       |
| LDL-C $> 3.4 \text{ mmol/L}$   | 0.85<br>(0.38–1.97) | 0.69    | 1.36<br>(0.96–1.94) | 0.08    | 1.33<br>(0.51–3.75)  | 0.57    | 1.31<br>(0.94–1.82) | 0.11    | -                    | -       | -                      | -       |
| Hyperuricemia <sup>b</sup>     | 1.01<br>(1.01–1.01) | <0.01   | 1.01<br>(0.91–1.01) | 0.23    | 1.01<br>(0.98–1.01)  | 0.75    | -                   | -       | -                    | -       | -                      | -       |
| HOMA-IR $\geq 2.69$            | -                   | -       | -                   | -       | 9.39<br>(4.41–20.17) | <0.01   | 4.48<br>(3.21–6.30) | <0.01   | 7.78<br>(4.44–13.59) | <0.01   | 27.13<br>(15.79–49.45) | <0.01   |

IR, insulin resistance; T2DM, type 2 diabetes mellitus; NAFLD, nonalcoholic fatty liver disease; OR, odds ratio; CI, confidence interval; FFA, free fatty acid; BMI, body mass index; TG, triglyceride; CHOL, cholesterol; HDL-C, high-density lipoprotein cholesterol; LDL-C, low-density lipoprotein cholesterol; HOMA-IR, homeostasis model assessment of insulin resistance.

<sup>a</sup>Abdominal obesity was defined as having a WC  $> 90 \text{ cm}$  for men and WC  $> 80 \text{ cm}$  for women, <sup>b</sup>Hyperuricemia was defined as uric acid  $> 420 \mu\text{mol/L}$  for men and  $> 360 \mu\text{mol/L}$  for women.
